# Supplementary material for: Economic Analysis of AbClo, a Novel Abdominal Fascia Closure Device, for Patients With an Open Abdomen Following Trauma or Acute Abdominal Surgery
Source: PubMed Central journal article supplement — Surg Innov. 2024 Feb 27;31(3):233–9. doi: 10.1177/15533506241236745 (PMC11047009; doi:10.1177/15533506241236745), 2024-02-27

## AbClo Application

During AbClo application, skin is first protected with a pressure relief dressing. The padded dressing(s) is applied around the wound defect to alleviate any direct pressure.

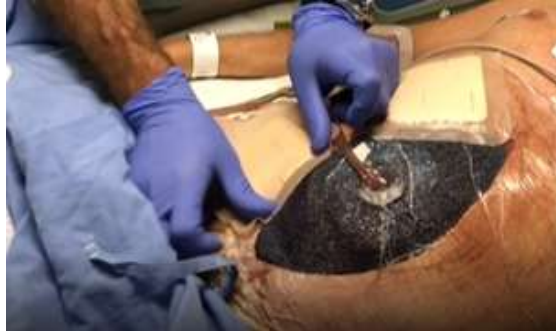

The Circumferential Dynamic retainer (CDR)/Device Binder is then pass through the patient's back; equally distributed on both sides and is aligned with the open abdomen.

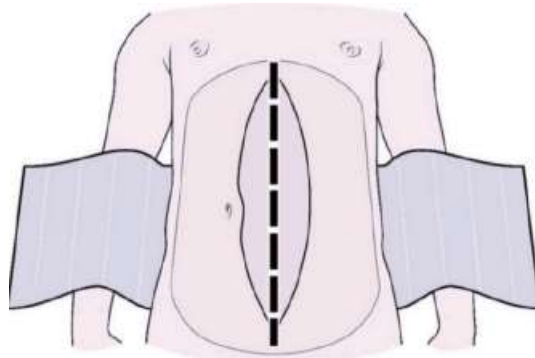

The Rectus Muscle Splints are then landmarked 2-3 finger widths away from the wound defect. This is conducted by lifting the cross bar up by pushing the knobs in and wards and passing the CDR through it and then locking the crossbar in place on both sides of the wound defect.

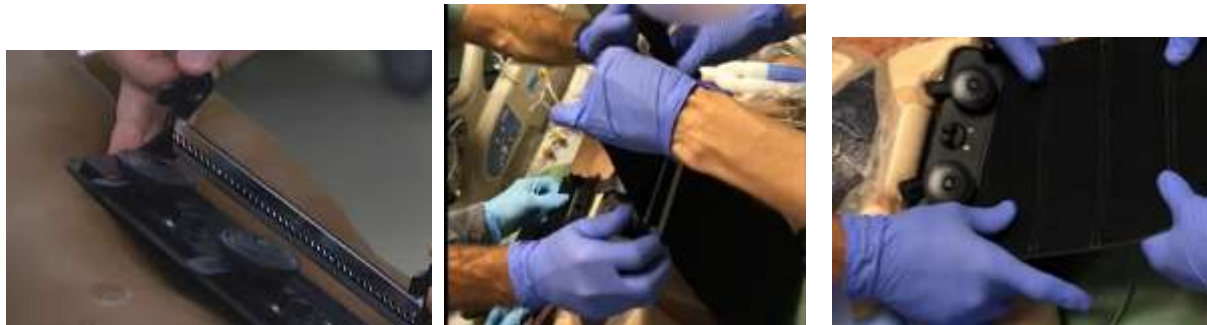

The Cables are then released by lifting the tensioner dials up, engaged, and then locked on both sides by pushing the tensioner dials down. The tensioner gauge balloon is calibrated by ensuring the needle reads in the blue zone. It is then passed through all four cables to gauge the amount of tension being applied.

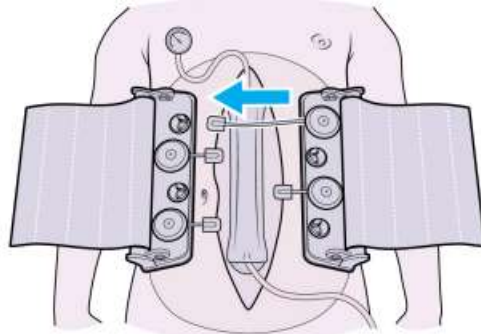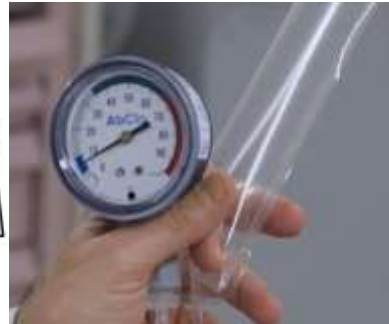

During the tightening of the cables a downwards medial pressure is applied to the muscles by pushing the cross bars inwards (towards each other) to engage the abdominal wall muscles.

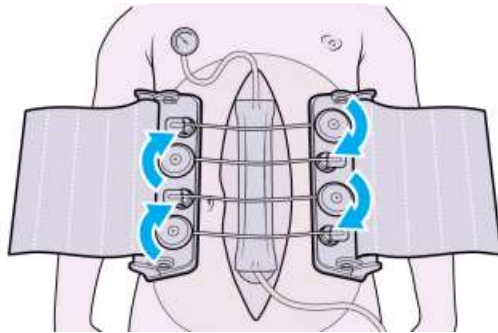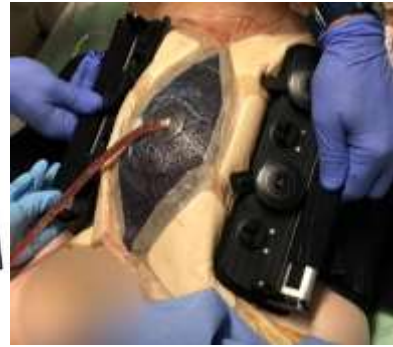

Appropriate amount of tension has been achieved when the gauge needle reads in the green zone.

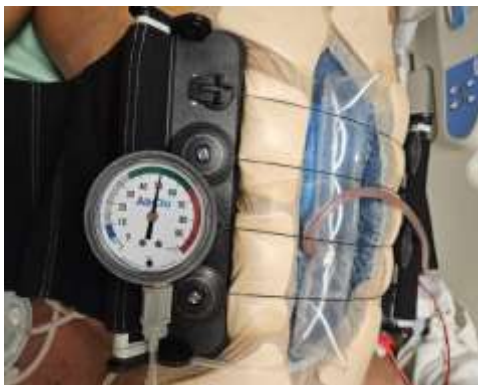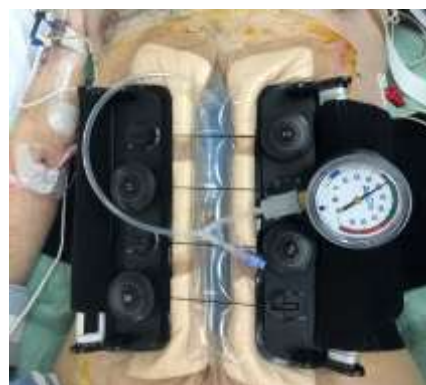

Supplement: sj-pdf-1-sri-10.1177_15533506241236745.pdf [file sj-pdf-1-sri-10.1177_15533506241236745.pdf]
